# Supplementary material
Source: publisher site journal article supplement (https://www.dovepress.com/article/476132)
Supplement: Supplementary file 1 [file get_supplementary_file.php]

**Supplementary Material**

**Questionnaire**

This questionnaire was designed to study the organizational behavior of the doctor-patient relationship. We sincerely invite you to participate in this survey. All information provided will be kept confidential for academic research purposes only. You can choose not to participate or withdraw at any time without any reason. Thank you again for your participation and support in this survey.

Would you like to participate in this survey?

□Yes □No

If the answer is "Yes," the survey continues; Otherwise, exit directly.

- **Basic information**

1. Date of birth: □□□□Year□□Month□□Day
2. Gender: □Male □Female
3. Educational level: □Primary and below □Junior secondary □Senior secondary □College and above
4. Address: □Urban □Rural
5. Occupation: □Farmer □Blue-collar □White-collar □Others

- **Doctor abusive supervision**

1. Your current direct physician has the following behavior toward you

|  | Very disagree | Disagree | Neutral | Agree | Very agree |
| --- | --- | --- | --- | --- | --- |
| He/she will laugh at me. |  |  |  |  |  |
| He/she told me that my ideas about my illness were stupid. |  |  |  |  |  |
| He/she ignored me or ignored my requests many times. |  |  |  |  |  |
| He/she has belittled me in front of others. |  |  |  |  |  |
| He/she has invaded my privacy. |  |  |  |  |  |
| He or she will mention many times that I have misbehaved or failed. |  |  |  |  |  |
| He/she will not actively acknowledge my efforts to cooperate with medical treatment. |  |  |  |  |  |
| He/she has accused me to avoid his/her own embarrassment. |  |  |  |  |  |
| He/she has broken a promise he/she made to me. |  |  |  |  |  |
| He/she will take out his/her unhappiness with himself/herself or others on me. |  |  |  |  |  |
| He/she speaks ill of me in front of others. |  |  |  |  |  |
| He/she has spoken to me in rude terms. |  |  |  |  |  |
| He/she does not allow me to interact with other medical staff or fellow patients. |  |  |  |  |  |
| He/she told me that I was not capable of cooperating with the treatment. |  |  |  |  |  |
| He/she has lied to me. |  |  |  |  |  |

- **Patient negative emotion**

1. This is a scale of 10 words describing different emotions. Please read each word carefully and answer based on how you actually felt or experienced after being admitted to the hospital. There is no good or wrong answer, please be true! To what extent are you experiencing any of the following emotions or feelings at this time?

|  | Little or none | Few | Medium | A lot | Many |
| --- | --- | --- | --- | --- | --- |
| Distressed |  |  |  |  |  |
| Upset |  |  |  |  |  |
| Guilty |  |  |  |  |  |
| Scared |  |  |  |  |  |
| Hostile |  |  |  |  |  |
| Irritable |  |  |  |  |  |
| Ashamed |  |  |  |  |  |
| Nervous |  |  |  |  |  |
| Jittery |  |  |  |  |  |
| Afraid |  |  |  |  |  |

- **Patient deviant behavior**

1. Do you have any of the following behaviors?

| **Interpersonal deviance** | Very disagree | Disagree | Neutral | Agree | Very agree |
| --- | --- | --- | --- | --- | --- |
| I made fun of some of the medical staff when I was in the hospital. |  |  |  |  |  |
| I was rude to the medical staff when I was in hospital. |  |  |  |  |  |
| I said some hurtful things to the medical staff when I was in hospital. |  |  |  |  |  |
| I'll leave it to someone else to report what I have to report to the doctor. |  |  |  |  |  |
| I play pranks on the medical staff when I'm in hospital. |  |  |  |  |  |
| I would say nasty things or lose my temper when I was in the hospital. |  |  |  |  |  |
| I will do my best to cooperate with what the doctor has ordered. |  |  |  |  |  |
| I would delay signing or treating to get the doctor's attention. |  |  |  |  |  |
| I willfully ignore and disobey the doctor's instructions. |  |  |  |  |  |

1. Do you have any of the following behaviors?

| **Organizational deviance** | Very disagree | Disagree | Neutral | Agree | Very agree |
| --- | --- | --- | --- | --- | --- |
| I do things in the inpatient room that the hospital doesn't allow. |  |  |  |  |  |
| I take things from the hospital without permission. |  |  |  |  |  |
| I tell people things that hurt the hospital's image. |  |  |  |  |  |
| I will leave without permission or delay my return to the ward. |  |  |  |  |  |
| I exaggerate my illness or say I have another illness. |  |  |  |  |  |
| I sometimes deliberately slow down the pace of my treatment. |  |  |  |  |  |
| I would find a reason not to pay my medical bills. |  |  |  |  |  |
| I will not come back to our hospital after this discharge. |  |  |  |  |  |
| I may discontinue treatment prescribed by your doctor early or transfer treatment to another hospital or doctor without permission. |  |  |  |  |  |
| I will relay hospital gossip to others when I leave the hospital. |  |  |  |  |  |

**Supplementary Table 1.** The variance inflation factor (VIF) of the mediation regression analyses in Table 3 and Table 4.

|  | Table 3 | | | Table 4 | | |
| --- | --- | --- | --- | --- | --- | --- |
| Model 1 | Model 2 | Model 3 | Model 1 | Model 2 | Model 3 |
| *Independent variable* |  |  |  |  |  |  |
| Abusive supervision | 1.01 | 1.01 | 1.03 | 1.01 | 1.01 | 1.03 |
| *Mediator* |  |  |  |  |  |  |
| Negative emotion |  |  | 1.03 |  |  | 1.03 |
| *Controlled variable* |  |  |  |  |  |  |
| Age | 1.22 | 1.22 | 1.22 | 1.22 | 1.22 | 1.22 |
| Sex | 1.01 | 1.01 | 1.01 | 1.01 | 1.01 | 1.01 |
| Address | 1.10 | 1.10 | 1.10 | 1.10 | 1.10 | 1.10 |
| Education | 1.12 | 1.12 | 1.12 | 1.12 | 1.12 | 1.12 |
| Occupation | 1.15 | 1.15 | 1.15 | 1.15 | 1.15 | 1.15 |
